# Supplementary material for: A Prognostic Model of Head and Neck Cancer Based on Amino Acid Metabolism-Related Signature and Its Implication for Immunosuppressive Microenvironment
Source: MDPI journal article supplement (doi:10.3390/ijms241411753), 2023-07-21
Supplement: s1 [file s1]

**Table S1. Primer sequences.**

|           |                         |
|-----------|-------------------------|
| ALDH2-F   | ATGGCAAGCCCTATGTCATCT   |
| ALDH2-R   | CCGTGGTACTTATCAGCCCA    |
| ACAT1-F   | TACCAGAAGTAAAGCAGCATGG  |
| ACAT1-R   | TCATTCACTGTACTGGCATTGG  |
| SMS-F     | TAGTGGGGATGTTAATTTGGCAG |
| SMS-R     | CCACACGTTTTTCGCATGTATTT |
| ASNS-F    | GGAAGACAGCCCCGATTTACT   |
| ASNS-R    | AGCACGAACTGTTGTAATGTCA  |
| GNMT-F    | CTGGGGTGGACTCCATTATGC   |
| GNMT-R    | GATGACCCACTTGTCTGAAGGC  |
| PLOD2-F   | CATGGACACAGGATAATGGCTG  |
| PLOD2-R   | AGGGGTTGGTTGCTCAATAAAAA |
| P4HA1-F   | AGTACAGCGACAAAAGATCCAG  |
| P4HA1-R   | CTCCAACCTCACTCCACTCAGTA |
| PAH-F     | GCCTGCTCTGACAAACATCAT   |
| PAH-R     | TTATCTCGTGAAAGCTCATGGAC |
| KYNU-F    | GGCTCTCCACCTAGATGAGGA   |
| KYNU-R    | GCTGCTATTTTGGCCCACTTAT  |
| PDL2-F    | ATTGCAGCTTCACCAGATAGC   |
| PDL2-R    | AAAGTTGCATTCCAGGGTCAC   |
| CD155-F   | TGGAGGTGACGCATGTGTC     |
| CD155-R   | GTTTGGACTCCGAATAGCTGG   |
| FGL1-F    | ATGGCAAAGGTGTTCAAGTTTCA |
| FGL1-R    | ACAATCTGCATACTGCCTCTTG  |
| LSECtin-F | AGTCCTTTGGGCTGTGATTCT   |
| LSECtin-R | AGGCGTTTGTCTCAGCAG      |
| PDL1-F    | TGGCATTGCTGAACGCATTT    |
| PDL1-R    | TGCAGCCAGGTCTAATTGTTTT  |
| GAPDH-F   | GGAGCGAGATCCCTCCAAAAT   |
| GAPDH-R   | GGCTGTTGCATACTTCTCATGG  |

Figure legend

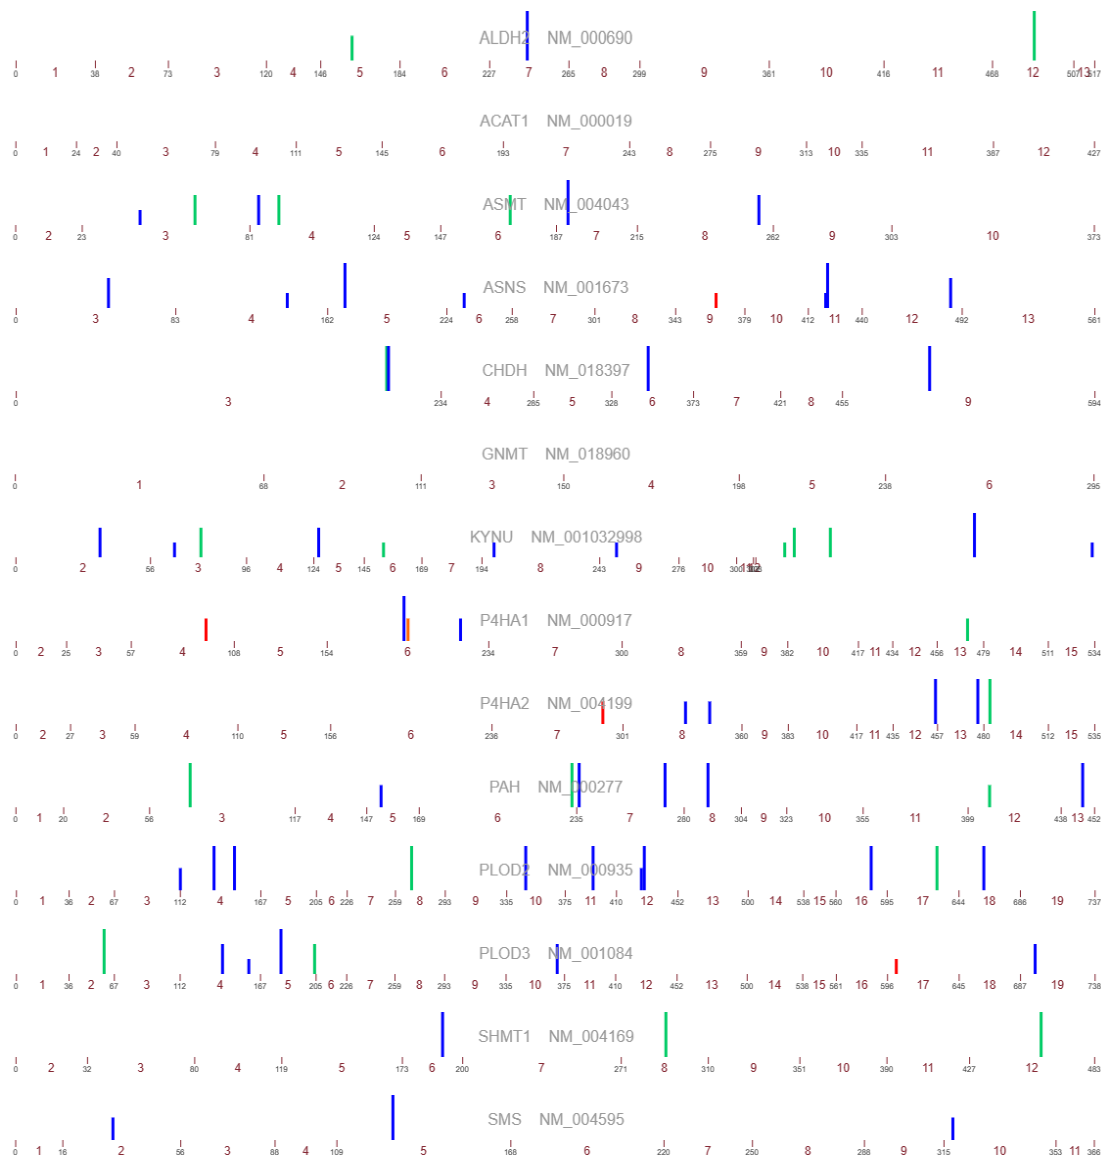

Figure S1. the mutations of AMGs in TCGA-HNC cohort. Mutation types: **silent** . **missense** . **inframe\_indel** . **frameshift** . **nonsense** .

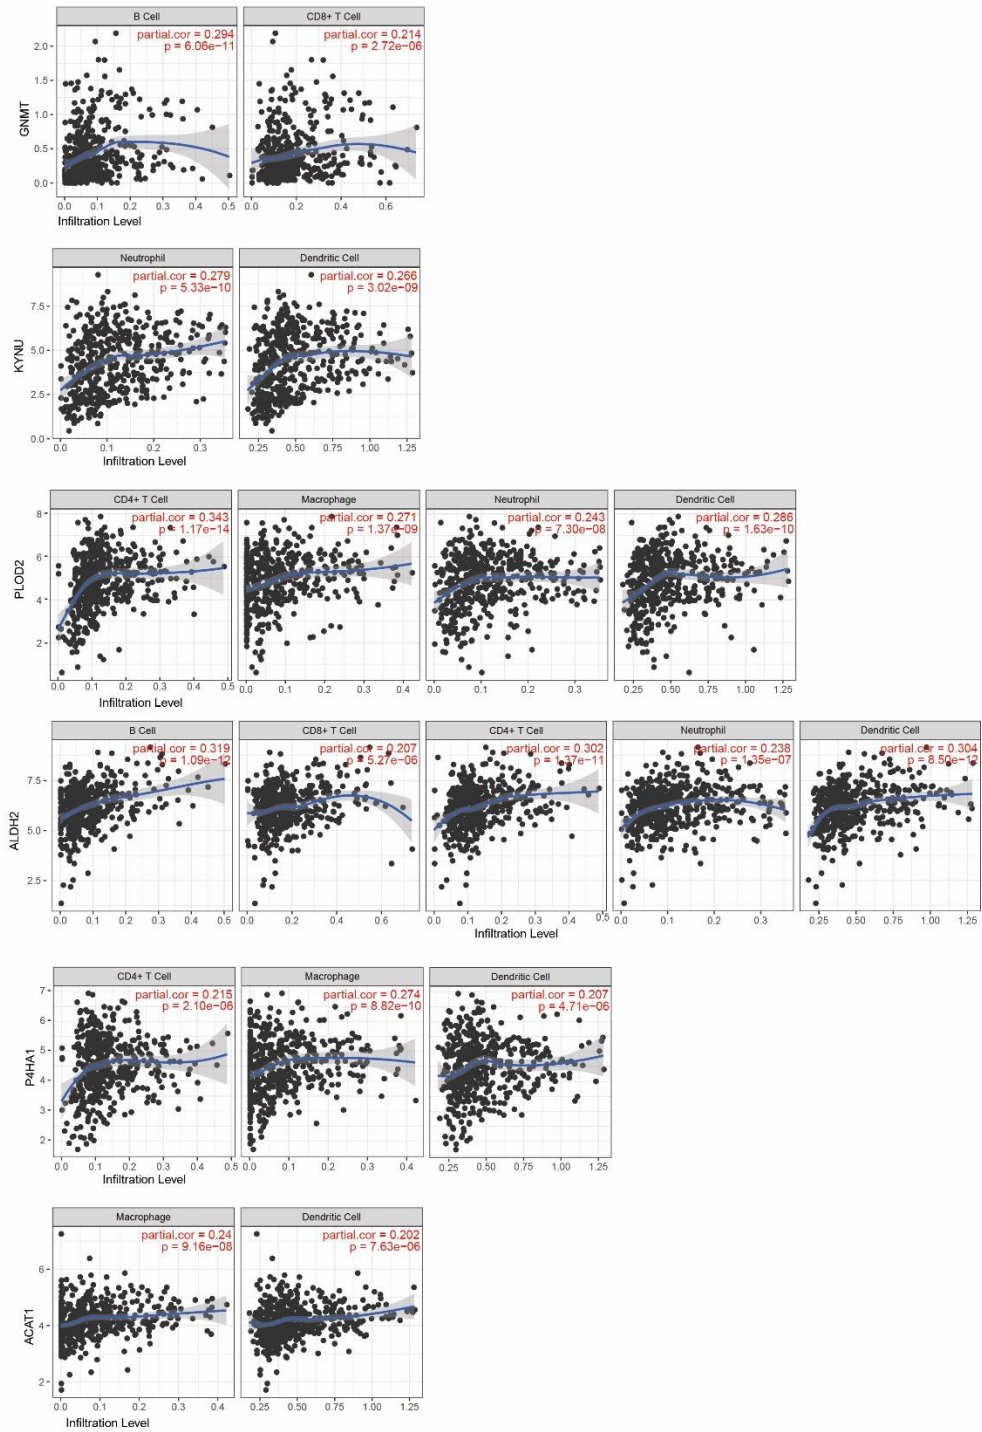

Figure S2. The correlation between these nine genes and the number of infiltration of multiple major immune cells (correlation coefficient >0.2, P value <0.05).

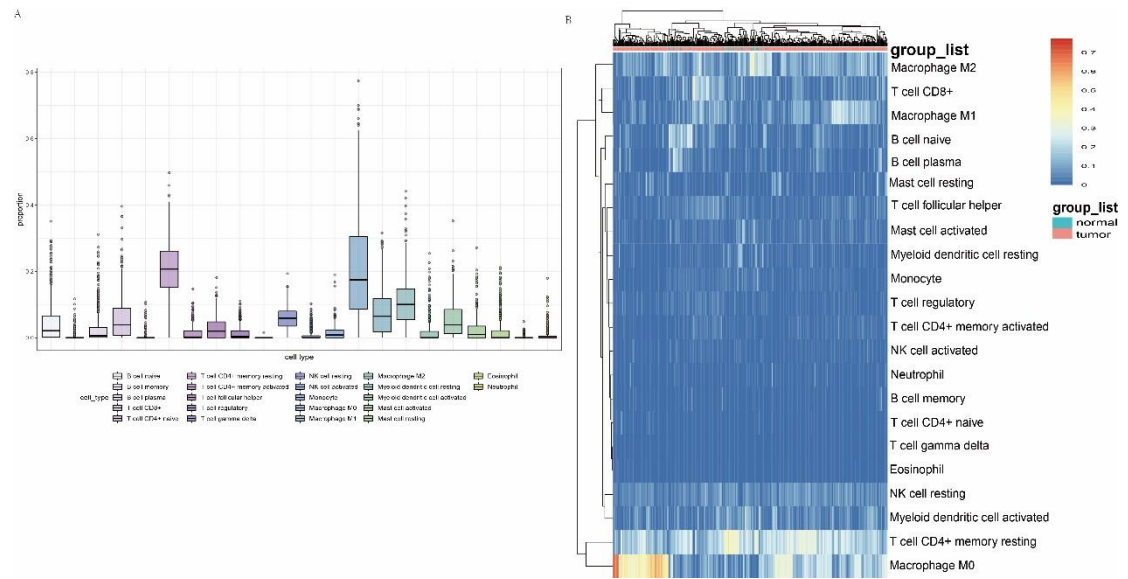

Figure S3. A, boxplot of 22 types of immune cell infiltration in HNC patients. B:heat map of immune infiltration in HNC patients.

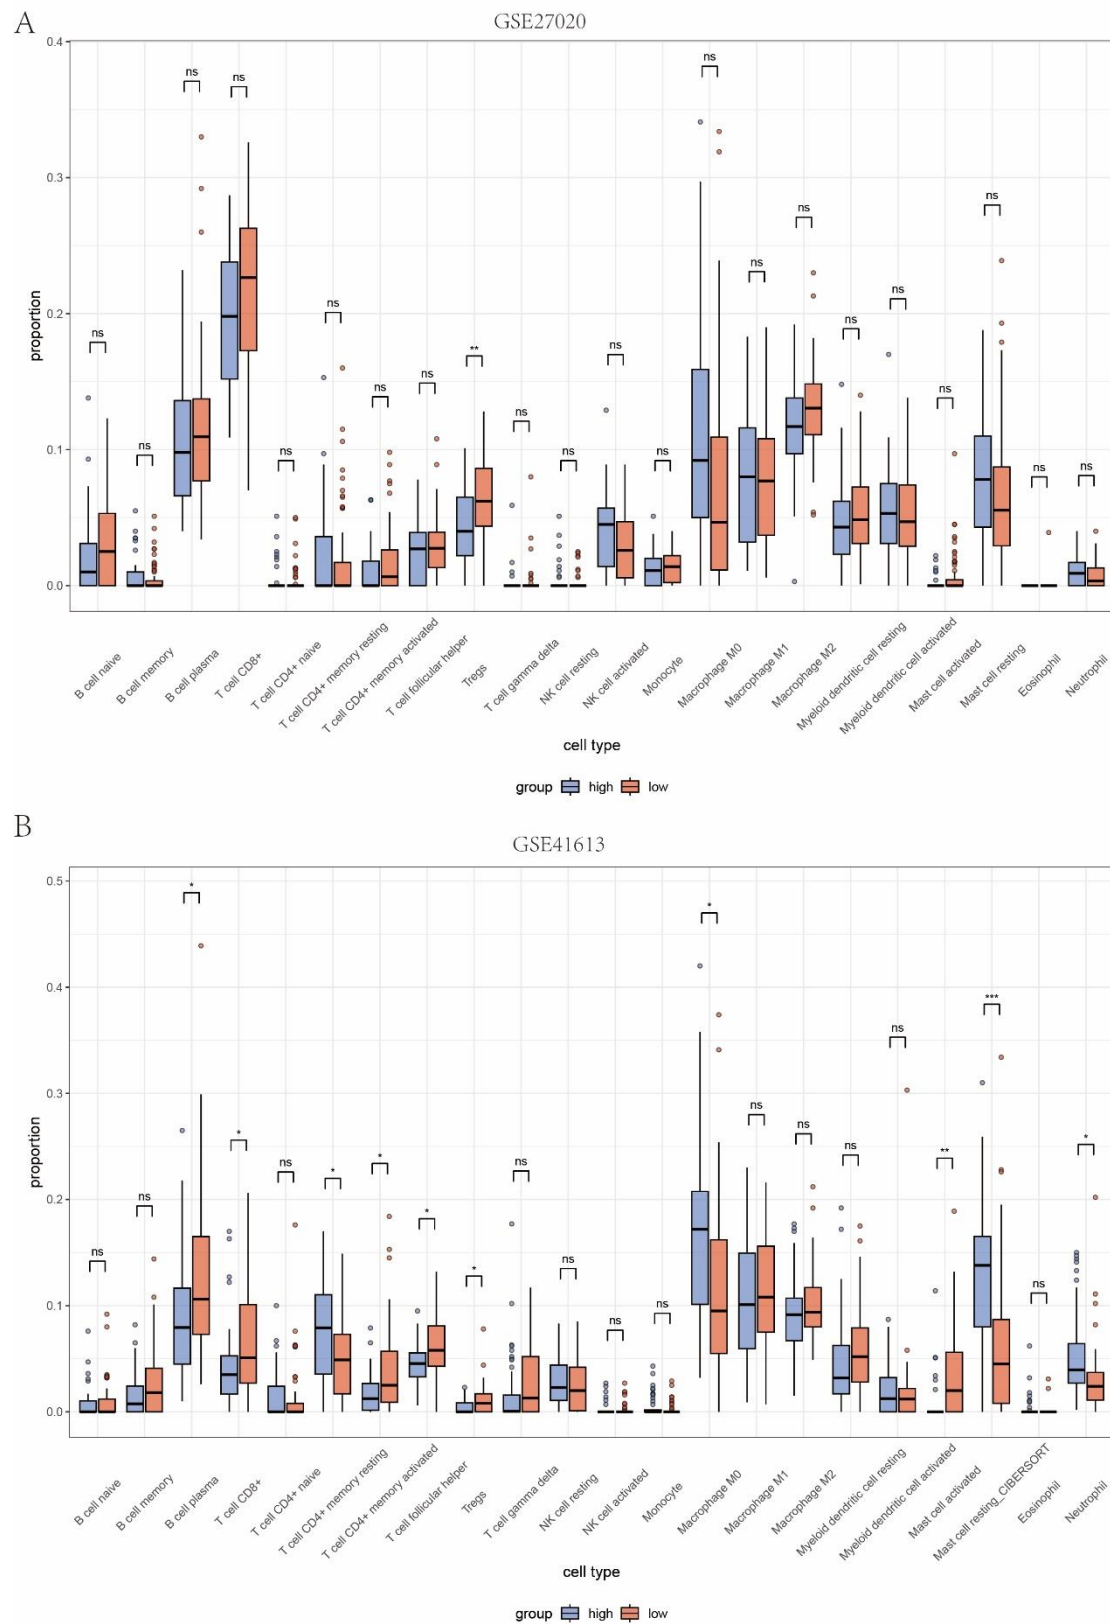

Figure S4. landscape of tumor immune microenvironment between high and low AMI groups.  
 \*  $p < 0.05$ , \*\*  $p < 0.01$ , \*\*\*  $p < 0.001$ , ns, no statistical significance.

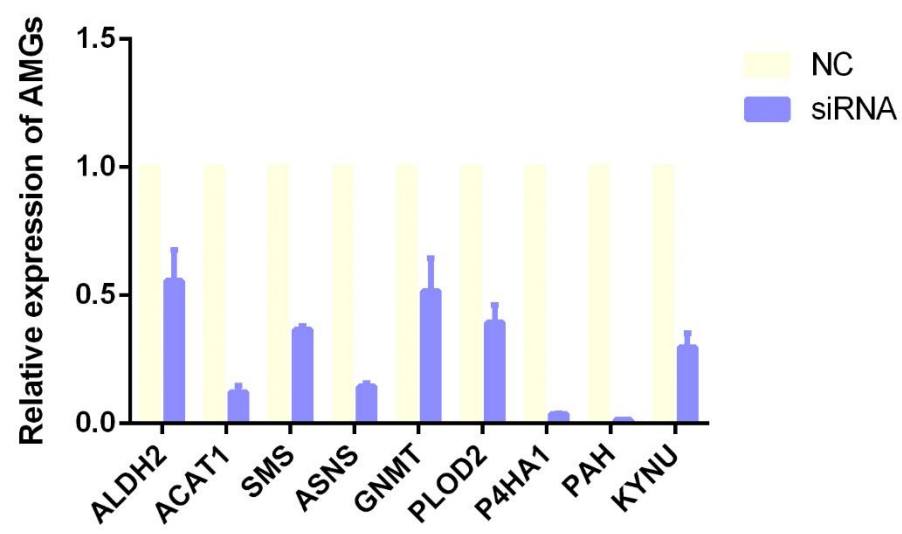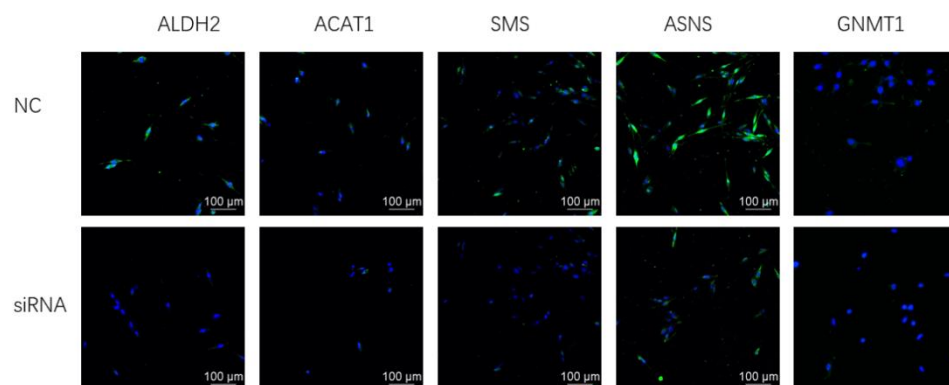

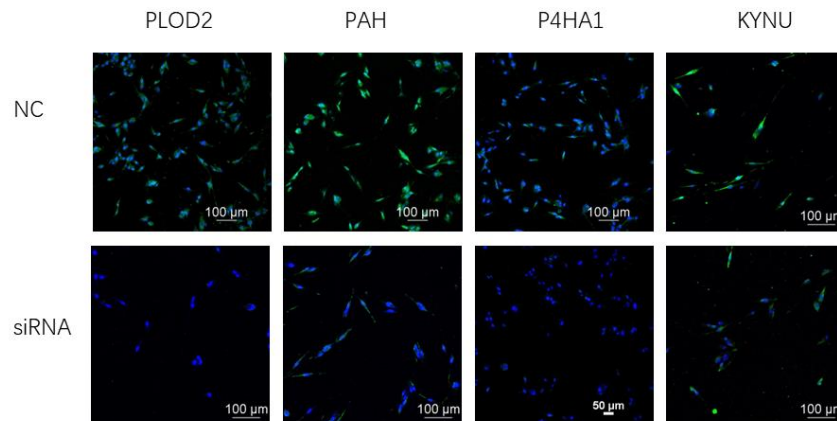

Figure S5. Verification of siRNAs suppresses AMGs expression by RT-qPCR before the invasion assay.

#### gene set names

KEGG\_AMINOACYL\_TRNA\_BIOSYNTHESIS  
 KEGG\_ALANINE\_ASPARTATE\_AND\_GLUTAMATE\_METABOLISM  
 KEGG\_GLYCINE\_SERINE\_AND\_THREONINE\_METABOLISM  
 KEGG\_CYSTEINE\_AND\_METHIONINE\_METABOLISM  
 KEGG\_VALINE\_LEUCINE\_AND\_ISOLEUCINE\_DEGRADATION  
 KEGG\_VALINE\_LEUCINE\_AND\_ISOLEUCINE\_BIOSYNTHESIS  
 KEGG\_LYSINE\_DEGRADATION  
 KEGG\_ARGININE\_AND\_PROLINE\_METABOLISM  
 KEGG\_HISTIDINE\_METABOLISM  
 KEGG\_TYROSINE\_METABOLISM  
 KEGG\_PHENYLALANINE\_METABOLISM  
 KEGG\_TRYPTOPHAN\_METABOLISM  
 KEGG\_BETA\_ALANINE\_METABOLISM  
 KEGG\_TAURINE\_AND\_HYPOTHAURINE\_METABOLISM  
 KEGG\_SELENOAMINO\_ACID\_METABOLISM  
 KEGG\_GLUTATHIONE\_METABOLISM  
 KEGG\_BUTANOATE\_METABOLISM  
  
 REACTOME\_METABOLISM\_OF\_AMINO\_ACIDS\_AND\_DERIVATIVES

#### Sample list

id  
 TCGA-CV-7103-11A-01R-2016-07

TCGA-CV-7091-11A-01R-2016-07  
TCGA-CV-6960-11A-01R-2016-07  
TCGA-H7-A6C5-11A-11R-A30B-07  
TCGA-CV-6938-11A-01R-1915-07  
TCGA-CV-7261-11A-01R-2016-07  
TCGA-CV-7177-11A-01R-2016-07  
TCGA-CV-7178-11A-01R-2016-07  
TCGA-CV-6936-11A-01R-1915-07  
TCGA-CV-7416-11A-01R-2081-07  
TCGA-H7-A6C4-11A-21R-A466-07  
TCGA-CV-7425-11A-01R-2081-07  
TCGA-HD-A6HZ-11A-11R-A31N-07  
TCGA-CV-7432-11A-01R-2132-07  
TCGA-CV-6961-11A-01R-1915-07  
TCGA-HD-A6I0-11A-11R-A31N-07  
TCGA-CV-7245-11A-01R-2016-07  
TCGA-CV-6955-11A-01R-2016-07  
TCGA-CV-7101-11A-01R-2016-07  
TCGA-CV-7255-11A-01R-2016-07  
TCGA-CV-7423-11A-01R-2081-07  
TCGA-CV-7238-11A-01R-2016-07  
TCGA-CV-7440-11A-01R-2187-07  
TCGA-HD-8635-11A-01R-2403-07  
TCGA-CV-6935-11A-01R-1915-07  
TCGA-CV-6939-11A-01R-1915-07  
TCGA-CV-6962-11A-01R-1915-07  
TCGA-CV-6959-11A-01R-1915-07  
TCGA-CV-7250-11A-01R-2016-07  
TCGA-CV-6956-11A-01R-2016-07  
TCGA-CV-6934-11A-01R-1915-07  
TCGA-CV-7183-11A-01R-2016-07  
TCGA-CV-7424-11A-01R-2081-07  
TCGA-WA-A7GZ-11A-11R-A34R-07  
TCGA-CV-6933-11A-01R-1915-07  
TCGA-CV-7242-11A-01R-2016-07  
TCGA-CV-7235-11A-01R-2016-07  
TCGA-CV-7252-11A-01R-2016-07  
TCGA-CV-7097-11A-01R-2016-07  
TCGA-CV-7438-11A-01R-2132-07  
TCGA-CV-7406-11A-01R-2081-07  
TCGA-CV-6943-11A-01R-1915-07  
TCGA-CV-7434-11A-01R-2132-07  
TCGA-CV-7437-11A-01R-2132-07  
TCGA-CV-A45W-01A-11R-A24Z-07



TCGA-CR-7388-01A-11R-2016-07  
TCGA-CR-7379-01A-11R-2016-07  
TCGA-CR-7393-01A-11R-2016-07  
TCGA-P3-A6T2-01A-11R-A34R-07  
TCGA-CN-4737-01A-01R-1436-07  
TCGA-CV-6960-01A-41R-2016-07  
TCGA-T3-A92N-01A-11R-A39I-07  
TCGA-CV-A6JZ-01A-11R-A31N-07  
TCGA-CV-7423-01A-11R-2081-07  
TCGA-CQ-6219-01A-11R-1915-07  
TCGA-CV-7430-01A-11R-2132-07  
TCGA-CV-A45X-01A-21R-A24Z-07  
TCGA-CV-6940-01A-11R-1915-07  
TCGA-CN-5361-01A-01R-1436-07  
TCGA-CV-5434-01A-01R-1686-07  
TCGA-BB-8601-01A-11R-2403-07  
TCGA-CV-A6JD-01A-11R-A31N-07  
TCGA-F7-A50I-01A-11R-A28V-07  
TCGA-CN-6989-01A-11R-1915-07  
TCGA-BA-A6DA-01A-31R-A31N-07  
TCGA-BB-A5HZ-01A-21R-A28V-07  
TCGA-CQ-A4CE-01A-11R-A266-07  
TCGA-BA-A6DL-01A-21R-A30B-07  
TCGA-CV-A45V-01A-21R-A24Z-07  
TCGA-CV-7568-01A-11R-2232-07  
TCGA-UF-A7JC-01A-21R-A34R-07  
TCGA-4P-AA8J-01A-11R-A39I-07  
TCGA-QK-A6IJ-01A-11R-A31N-07  
TCGA-F7-A624-01A-22R-A30B-07  
TCGA-HD-A633-01A-11R-A28V-07  
TCGA-CV-7440-01A-11R-2132-07  
TCGA-CV-A6K1-01A-11R-A31N-07  
TCGA-BA-6873-01A-11R-1873-07  
TCGA-CV-7410-01A-21R-2081-07  
TCGA-CV-6934-01A-11R-1915-07  
TCGA-CV-5971-01A-11R-1686-07  
TCGA-CR-7399-01A-11R-2016-07  
TCGA-BA-6872-01A-11R-1873-07  
TCGA-CV-5444-01A-02R-1514-07  
TCGA-UF-A7JS-01A-11R-A34R-07  
TCGA-UF-A718-01A-22R-A34R-07  
TCGA-CR-7394-01A-11R-2016-07  
TCGA-CV-7421-01A-11R-2081-07  
TCGA-CV-6003-01A-11R-1686-07

TCGA-CR-6473-01A-11R-1873-07  
TCGA-UF-A719-01A-12R-A34R-07  
TCGA-P3-A5QE-01A-11R-A28V-07  
TCGA-CN-6022-01A-21R-1686-07  
TCGA-HD-8634-01A-11R-2403-07  
TCGA-CN-4725-01A-01R-1436-07  
TCGA-CV-7178-01A-21R-2016-07  
TCGA-CV-7428-01A-11R-2132-07  
TCGA-H7-8501-01A-11R-2403-07  
TCGA-HD-A6HZ-01A-12R-A31N-07  
TCGA-C9-A47Z-01A-11R-A24H-07  
TCGA-CV-A6K2-01A-11R-A31N-07  
TCGA-CN-A642-01A-12R-A30B-07  
TCGA-CV-A463-01A-11R-A266-07  
TCGA-CQ-A4CB-01A-11R-A24Z-07  
TCGA-CN-4739-01A-02R-1514-07  
TCGA-D6-8569-01A-11R-2403-07  
TCGA-CV-A464-01A-11R-A266-07  
TCGA-CV-5977-01A-11R-1686-07  
TCGA-CV-6441-01A-11R-1686-07  
TCGA-HD-7832-01A-11R-2132-07  
TCGA-F7-7848-01A-11R-2132-07  
TCGA-CR-7404-01A-11R-2132-07  
TCGA-CV-7238-01A-11R-2016-07  
TCGA-IQ-A61I-01A-11R-A30B-07  
TCGA-IQ-7630-01A-11R-2081-07  
TCGA-CV-6433-01A-11R-1686-07  
TCGA-TN-A7HJ-01A-12R-A34R-07  
TCGA-CV-A6JY-01A-11R-A31N-07  
TCGA-CV-6936-01A-11R-1915-07  
TCGA-CR-7368-01A-11R-2132-07  
TCGA-CQ-7071-01A-12R-A30B-07  
TCGA-BA-4078-01A-01R-1436-07  
TCGA-CV-7180-01A-11R-2016-07  
TCGA-CN-6994-01A-11R-1915-07  
TCGA-CV-A6K0-01B-21R-A31N-07  
TCGA-CR-6488-01A-12R-2081-07  
TCGA-CN-6997-01A-11R-2016-07  
TCGA-CN-6020-01A-11R-1686-07  
TCGA-CN-4729-01A-01R-1436-07  
TCGA-CN-4738-01A-02R-1514-07  
TCGA-CR-7374-01A-11R-2016-07  
TCGA-CV-7429-01A-11R-2132-07  
TCGA-CV-7183-01A-11R-2016-07

TCGA-HD-7753-01A-11R-2081-07  
TCGA-BA-6870-01A-11R-1873-07  
TCGA-CN-A498-01A-11R-A24H-07  
TCGA-CR-7365-01A-11R-2016-07  
TCGA-CN-4728-01A-01R-1436-07  
TCGA-CV-7252-01A-11R-2016-07  
TCGA-CQ-6220-01A-11R-1915-07  
TCGA-CN-4733-01A-02R-1873-07  
TCGA-CV-7255-01A-11R-2016-07  
TCGA-CN-6016-01A-11R-1686-07  
TCGA-BA-A4IF-01A-11R-A266-07  
TCGA-P3-A6SW-01A-11R-A34R-07  
TCGA-HD-7229-01A-11R-2016-07  
TCGA-CQ-7063-01A-11R-2403-07  
TCGA-CV-A6JE-01A-11R-A31N-07  
TCGA-CQ-A4CA-01A-11R-A24Z-07  
TCGA-CV-6950-01A-11R-1915-07  
TCGA-CQ-6223-01A-11R-1915-07  
TCGA-CV-7406-01A-11R-2081-07  
TCGA-CV-7103-01A-21R-2016-07  
TCGA-CV-7432-01A-11R-2132-07  
TCGA-CV-5432-01A-02R-1686-07  
TCGA-UF-A7JT-01A-11R-A34R-07  
TCGA-HD-A6IO-01A-11R-A31N-07  
TCGA-UF-A7JF-01A-11R-A34R-07  
TCGA-CV-7435-01A-11R-2132-07  
TCGA-CV-A45T-01A-11R-A24H-07  
TCGA-CV-7413-01A-11R-2081-07  
TCGA-CN-A49B-01A-31R-A24H-07  
TCGA-MT-A7BN-01A-12R-A34R-07  
TCGA-QK-A6II-01A-11R-A31N-07  
TCGA-D6-8568-01A-11R-2403-07  
TCGA-HD-7754-01A-11R-2081-07  
TCGA-HD-8224-01A-11R-2403-07  
TCGA-HD-A4C1-01A-11R-A24H-07  
TCGA-KU-A6H7-01A-11R-A31N-07  
TCGA-CN-4735-01A-01R-1436-07  
TCGA-CV-5976-01A-11R-1686-07  
TCGA-CV-5441-01A-01R-1514-07  
TCGA-CV-7446-01A-11R-2232-07  
TCGA-D6-A4Z9-01A-11R-A24Z-07  
TCGA-CV-7437-01A-21R-2132-07  
TCGA-F7-A623-01A-11R-A28V-07  
TCGA-CR-7392-01A-11R-2016-07

TCGA-QK-A8ZB-01A-11R-A39I-07  
TCGA-CN-4727-01A-01R-1436-07  
TCGA-CV-5436-01A-01R-1514-07  
TCGA-CV-6945-01A-11R-1915-07  
TCGA-CQ-A4C7-01A-11R-A24Z-07  
TCGA-BA-5559-01A-01R-1514-07  
TCGA-CV-7102-01A-11R-2016-07  
TCGA-CV-7104-01A-11R-2016-07  
TCGA-CN-6998-01A-23R-2016-07  
TCGA-MT-A51W-01A-21R-A266-07  
TCGA-CN-A63V-01A-11R-A466-07  
TCGA-CV-5443-01A-01R-1514-07  
TCGA-D6-6517-01A-11R-1873-07  
TCGA-CV-6933-01A-11R-1915-07  
TCGA-CN-4723-01A-01R-1436-07  
TCGA-QK-AA3J-01A-11R-A39I-07  
TCGA-CR-7380-01A-11R-2016-07  
TCGA-CV-7177-01A-11R-2016-07  
TCGA-UP-A6WW-01A-12R-A34R-07  
TCGA-QK-A6V9-01A-11R-A34R-07  
TCGA-CQ-5329-01A-01R-1686-07  
TCGA-F7-A61S-01A-11R-A28V-07  
TCGA-CQ-6227-01A-11R-1915-07  
TCGA-CV-5440-01A-01R-1514-07  
TCGA-KU-A66S-01A-21R-A30B-07  
TCGA-T2-A6X0-01A-11R-A34R-07  
TCGA-D6-A6EN-01A-11R-A31N-07  
TCGA-CR-6472-01A-11R-1873-07  
TCGA-UF-A7JD-01A-11R-A34R-07  
TCGA-QK-A6VB-01A-12R-A34R-07  
TCGA-CQ-5330-01A-01R-1686-07  
TCGA-CR-7390-01A-11R-2016-07  
TCGA-CV-6941-01A-11R-1915-07  
TCGA-CV-7101-01A-11R-2016-07  
TCGA-CV-5973-01A-11R-1686-07  
TCGA-CQ-A4CH-01A-11R-A266-07  
TCGA-CQ-6228-01A-11R-1915-07  
TCGA-MZ-A5BI-01A-31R-A34R-07  
TCGA-F7-A620-01A-11R-A28V-07  
TCGA-BA-A6DB-01A-11R-A30B-07  
TCGA-CN-4730-01A-01R-1436-07  
TCGA-CR-7386-01A-11R-2016-07  
TCGA-P3-A5QA-01A-11R-A28V-07  
TCGA-CV-6937-01A-11R-2016-07

TCGA-CN-6988-01A-11R-1915-07  
TCGA-QK-A652-01A-11R-A30B-07  
TCGA-CN-6012-01A-11R-1686-07  
TCGA-CV-6942-01A-21R-2016-07  
TCGA-CR-6467-01A-11R-1873-07  
TCGA-CV-7242-01A-11R-2016-07  
TCGA-CR-6470-01A-11R-1873-07  
TCGA-D6-A6ES-01A-12R-A31N-07  
TCGA-H7-7774-01A-21R-2081-07  
TCGA-BB-4217-01A-11R-2081-07  
TCGA-CN-A49A-01A-11R-A24H-07  
TCGA-CV-7407-01A-11R-2081-07  
TCGA-CV-A6JO-01B-11R-A34R-07  
TCGA-CX-7085-01A-21R-2016-07  
TCGA-F7-A61W-01A-11R-A28V-07  
TCGA-CN-A6V3-01A-12R-A34R-07  
TCGA-IQ-7631-01A-11R-2081-07  
TCGA-T2-A6WX-01A-12R-A34R-07  
TCGA-CN-5369-01A-01R-1436-07  
TCGA-UF-A71E-01A-31R-A34R-07  
TCGA-CV-7424-01A-11R-2081-07  
TCGA-CV-6943-01A-11R-1915-07  
TCGA-D6-6515-01A-21R-1873-07  
TCGA-D6-6825-01A-21R-1915-07  
TCGA-CN-6021-01A-11R-1686-07  
TCGA-DQ-7588-01A-11R-2081-07  
TCGA-F7-A50G-01A-11R-A266-07  
TCGA-BA-A6DI-01A-11R-A30B-07  
TCGA-CR-5250-01A-01R-1514-07  
TCGA-BA-4077-01B-01R-1436-07  
TCGA-CV-A45Q-01A-11R-A24H-07  
TCGA-KU-A6H8-01A-21R-A34R-07  
TCGA-RS-A6TP-01A-12R-A34R-07  
TCGA-CV-5978-01A-11R-1686-07  
TCGA-CQ-A4CG-01A-11R-A266-07  
TCGA-BA-4076-01A-01R-1436-07  
TCGA-MT-A67D-01A-31R-A30B-07  
TCGA-D6-A6EQ-01A-11R-A31N-07  
TCGA-CV-A6JT-01A-11R-A31N-07  
TCGA-CV-6948-01A-11R-1915-07  
TCGA-UF-A7JA-01A-12R-A34R-07  
TCGA-P3-A6SX-01A-11R-A34R-07  
TCGA-BB-4224-01A-01R-1436-07  
TCGA-CV-A45Z-01A-21R-A24Z-07

TCGA-CV-7438-01A-21R-2132-07  
TCGA-CQ-5332-01A-01R-1686-07  
TCGA-BA-A4IG-01A-11R-A266-07  
TCGA-UF-A7JV-01A-11R-A34R-07  
TCGA-CN-6018-01A-11R-1686-07  
TCGA-DQ-5625-01A-01R-1873-07  
TCGA-KU-A6H7-06A-21R-A31N-07  
TCGA-CN-A499-01A-11R-A24H-07  
TCGA-CV-6939-01A-11R-1915-07  
TCGA-CV-5970-01A-11R-1686-07  
TCGA-CR-6477-01A-11R-1873-07  
TCGA-H7-8502-01A-11R-2403-07  
TCGA-H7-A6C4-01A-11R-A30B-07  
TCGA-DQ-7591-01A-11R-2081-07  
TCGA-CN-5363-01A-01R-1436-07  
TCGA-CV-6955-01A-11R-2016-07  
TCGA-UF-A7J9-01A-12R-A34R-07  
TCGA-CR-6480-01A-11R-1873-07  
TCGA-CN-5358-01A-01R-1514-07  
TCGA-CQ-6218-01A-11R-1915-07  
TCGA-D6-6826-01A-11R-1915-07  
TCGA-F7-8489-01A-31R-2403-07  
TCGA-BA-A6DE-01A-22R-A31N-07  
TCGA-CR-6474-01A-11R-1873-07  
TCGA-BA-5151-01A-01R-1436-07  
TCGA-H7-A76A-01A-51R-A34R-07  
TCGA-CV-7414-01A-11R-2081-07  
TCGA-HD-8314-01A-11R-2403-07  
TCGA-CV-7247-01A-11R-2016-07  
TCGA-CV-6953-01A-11R-1915-07  
TCGA-IQ-7632-01A-11R-2081-07  
TCGA-CN-A6V7-01A-12R-A34R-07  
TCGA-IQ-A61G-01A-11R-A30B-07  
TCGA-F7-A622-01A-11R-A28V-07  
TCGA-CV-6961-01A-21R-1915-07  
TCGA-CQ-5331-01A-02R-1873-07  
TCGA-D6-6823-01A-11R-1915-07  
TCGA-IQ-A61J-01A-11R-A30B-07  
TCGA-CV-7261-01A-11R-2016-07  
TCGA-CV-7097-01A-11R-2016-07  
TCGA-P3-A6T4-01A-11R-A34R-07  
TCGA-CV-5435-01A-01R-1686-07  
TCGA-CN-5360-01A-01R-1436-07  
TCGA-CQ-5325-01A-01R-1686-07

TCGA-BB-A5HY-01A-11R-A28V-07  
TCGA-CN-A6V6-01A-12R-A34R-07  
TCGA-BA-A6D8-01A-31R-A31N-07  
TCGA-CV-7236-01A-11R-2016-07  
TCGA-CN-4742-01A-02R-1514-07  
TCGA-CV-7425-01A-11R-2081-07  
TCGA-CR-7395-01A-11R-2016-07  
TCGA-DQ-5624-01A-01R-1873-07  
TCGA-UF-A7JO-01A-11R-A34R-07  
TCGA-BB-4228-01A-01R-1436-07  
TCGA-CV-7089-01A-11R-2016-07  
TCGA-CQ-6225-01A-11R-1915-07  
TCGA-P3-A6T8-01A-11R-A34R-07  
TCGA-HD-7831-01A-11R-2132-07  
TCGA-CN-A63W-01A-11R-A30B-07  
TCGA-UF-A71A-06A-11R-A39I-07  
TCGA-CV-5431-01A-01R-1514-07  
TCGA-BA-5555-01A-01R-1514-07  
TCGA-CR-6491-01A-11R-1873-07  
TCGA-CX-7086-01A-11R-2081-07  
TCGA-F7-8298-01A-11R-2403-07  
TCGA-BA-5152-01A-02R-1873-07  
TCGA-CR-7364-01A-11R-2016-07  
TCGA-IQ-A6SG-01A-12R-A34R-07  
TCGA-CV-6951-01A-11R-1915-07  
TCGA-CN-6996-01A-11R-1915-07  
TCGA-CV-7100-01A-11R-2016-07  
TCGA-CN-4740-01A-01R-1436-07  
TCGA-CN-A63T-01A-11R-A28V-07  
TCGA-CQ-5326-01A-01R-1873-07  
TCGA-CQ-A4C6-01A-11R-A24Z-07  
TCGA-CN-6992-01A-11R-1915-07  
TCGA-CR-6481-01A-11R-1873-07  
TCGA-T3-A92M-01A-31R-A39I-07  
TCGA-T2-A6WZ-01A-21R-A34R-07  
TCGA-P3-A6T7-01A-11R-A34R-07  
TCGA-CN-5356-01A-01R-1436-07  
TCGA-CV-7253-01A-11R-2016-07  
TCGA-P3-A5Q6-01A-11R-A28V-07  
TCGA-CN-A6UY-01A-12R-A34R-07  
TCGA-CR-7370-01A-11R-2132-07  
TCGA-TN-A7HI-01A-11R-A34R-07  
TCGA-CQ-A4C9-01A-11R-A24Z-07  
TCGA-UF-A71D-01A-12R-A34R-07

TCGA-IQ-A61H-01A-11R-A30B-07  
TCGA-CR-5248-01A-01R-2016-07  
TCGA-BB-4227-01A-01R-1873-07  
TCGA-CN-5355-01A-01R-1436-07  
TCGA-MZ-A7D7-01A-21R-A34R-07  
TCGA-CV-7091-01A-11R-2016-07  
TCGA-BA-5153-01A-01R-1436-07  
TCGA-MT-A67A-01A-11R-A30B-07  
TCGA-BB-8596-01A-11R-2403-07  
TCGA-D6-A6EM-01A-21R-A31N-07  
TCGA-CN-4726-01A-01R-1436-07  
TCGA-CV-7099-01A-41R-2016-07  
TCGA-CN-5370-01A-01R-2016-07  
TCGA-CQ-7069-01A-11R-2403-07  
TCGA-BA-A4IH-01A-11R-A266-07  
TCGA-CR-7402-01A-11R-2016-07  
TCGA-CN-5373-01A-01R-1436-07  
TCGA-CN-5374-01A-01R-1436-07  
TCGA-BA-A6DG-01A-21R-A30B-07  
TCGA-CN-5359-01A-01R-1436-07  
TCGA-CN-5365-01A-01R-1436-07  
TCGA-BA-5557-01A-01R-1514-07  
TCGA-CV-7416-01A-11R-2081-07  
TCGA-CV-7095-01A-21R-2016-07  
TCGA-BA-6868-01B-12R-1915-07  
TCGA-HL-7533-01A-11R-2232-07  
TCGA-CV-A45U-01A-12R-A24H-07  
TCGA-HD-8635-01A-11R-2403-07  
TCGA-CR-7372-01A-11R-2016-07  
TCGA-CR-7373-01A-11R-2016-07  
TCGA-CV-A6JU-01A-11R-A31N-07  
TCGA-CQ-5334-01A-01R-1686-07  
TCGA-CV-6952-01A-11R-1915-07  
TCGA-CN-A63U-01A-11R-A30B-07  
TCGA-CR-7371-01A-11R-2016-07  
TCGA-CV-A460-01A-21R-A24Z-07  
TCGA-CR-7376-01A-11R-2132-07  
TCGA-CR-5249-01A-01R-1514-07  
TCGA-CV-7433-01A-11R-2132-07  
TCGA-CV-7235-01A-11R-2016-07  
TCGA-CR-7385-01A-11R-2016-07  
TCGA-CV-7418-01A-11R-2081-07  
TCGA-CN-A497-01A-11R-A24H-07  
TCGA-CV-7422-01A-21R-2081-07



TCGA-CV-5439-01A-01R-1686-07  
TCGA-CR-6487-01A-11R-1873-07  
TCGA-BA-A4II-01A-11R-A266-07  
TCGA-BA-A8YP-01A-11R-A39I-07  
TCGA-CV-A45Y-01A-11R-A24Z-07  
TCGA-CQ-7065-01A-11R-2081-07  
TCGA-DQ-5629-01A-01R-1873-07  
TCGA-CQ-A4CI-01A-11R-A266-07  
TCGA-QK-A8ZA-01A-11R-A39I-07  
TCGA-CV-6962-01A-11R-1915-07  
TCGA-DQ-5630-01A-01R-1873-07  
TCGA-BB-4225-01A-01R-1436-07  
TCGA-CV-5979-01A-11R-1686-07  
TCGA-QK-A64Z-01A-11R-A30B-07  
TCGA-WA-A7GZ-01A-11R-A34R-07  
TCGA-KU-A66T-01A-11R-A30B-07  
TCGA-HD-A634-01A-11R-A28V-07  
TCGA-CV-6959-01A-11R-1915-07  
TCGA-CR-5247-01A-01R-2016-07  
TCGA-CR-6478-01A-11R-1873-07  
TCGA-CN-6017-01A-11R-1686-07  
TCGA-CQ-6224-01A-11R-1915-07  
TCGA-QK-A6IG-01A-11R-A31N-07  
TCGA-D6-6824-01A-11R-1915-07  
TCGA-CV-7415-01A-11R-2081-07  
TCGA-BA-5558-01A-01R-1514-07  
TCGA-BA-7269-01A-11R-2016-07  
TCGA-CV-5430-01A-02R-1686-07  
TCGA-UF-A71A-01A-22R-A34R-07  
TCGA-UF-A7JJ-01A-11R-A34R-07  
TCGA-CQ-5333-01A-01R-2403-07  
TCGA-CV-A461-01A-41R-A266-07  
TCGA-CV-6938-01A-11R-1915-07  
TCGA-CR-6482-01A-11R-1873-07  
TCGA-CV-7263-01A-11R-2016-07  
TCGA-CN-4731-01A-01R-1436-07  
TCGA-QK-A8Z8-01A-11R-A39I-07  
TCGA-TN-A7HL-01A-11R-A34R-07  
TCGA-RS-A6TO-01A-32R-A34R-07  
TCGA-CV-A6JN-01A-11R-A31N-07  
TCGA-CQ-5327-01A-01R-1686-07  
TCGA-BB-A5HU-01A-11R-A28V-07  
TCGA-CV-A6JM-01A-11R-A31N-07  
TCGA-CR-7383-01A-11R-2132-07

TCGA-CQ-6229-01A-11R-1915-07  
TCGA-CX-7219-01A-11R-2016-07  
TCGA-CN-6010-01A-11R-1686-07  
TCGA-BB-4223-01A-01R-1436-07  
TCGA-CR-7389-01A-11R-2016-07  
TCGA-CX-7082-01A-11R-2016-07  
TCGA-IQ-A61O-01A-11R-A30B-07  
TCGA-BA-4075-01A-01R-1436-07  
TCGA-CQ-6222-01A-11R-1915-07  
TCGA-BA-5556-01A-01R-1514-07  
TCGA-D6-A6EO-01A-11R-A31N-07  
TCGA-CV-7248-01A-11R-2016-07  
TCGA-BB-A6UO-01A-12R-A34R-07  
TCGA-C9-A480-01A-12R-A24H-07  
TCGA-CV-5442-01A-01R-1514-07  
TCGA-CR-7382-01A-11R-2132-07  
TCGA-CQ-5324-01A-01R-1686-07  
TCGA-CV-7427-01A-11R-2081-07  
TCGA-CQ-5323-01A-01R-1686-07  
TCGA-D6-A4ZB-01A-11R-A24Z-07  
TCGA-CV-A45P-01A-11R-A24H-07  
TCGA-CV-5966-01A-11R-1686-07  
TCGA-CN-A641-01A-11R-A30B-07  
TCGA-CR-6484-01A-11R-1873-07  
TCGA-CR-6492-01A-12R-2081-07  
TCGA-CV-6935-01A-11R-1915-07  
TCGA-CV-6436-01A-11R-1686-07  
TCGA-P3-A6T0-01A-12R-A34R-07  
TCGA-BA-6871-01A-11R-1873-07  
TCGA-QK-A6VC-01A-23R-A34R-07  
TCGA-CN-4736-01A-01R-1436-07  
TCGA-P3-A5Q5-01A-11R-A28V-07  
TCGA-CR-7377-01A-11R-2016-07  
TCGA-P3-A6T3-01A-11R-A34R-07  
TCGA-F7-A61V-01A-11R-A28V-07  
TCGA-CQ-7068-01A-11R-2081-07  
TCGA-CV-A465-01A-11R-A266-07  
TCGA-CN-A49C-01A-11R-A24H-07  
TCGA-D6-A6EP-01A-11R-A31N-07  
TCGA-CV-7245-01A-11R-2016-07  
TCGA-CR-6471-01A-11R-1873-07  
TCGA-CR-6493-01A-11R-1873-07  
TCGA-CV-6956-01A-21R-2016-07  
TCGA-UF-A7JH-01A-21R-A34R-07

TCGA-CR-5243-01A-01R-1514-07  
TCGA-CR-7398-01A-11R-2016-07  
TCGA-CV-A45R-01A-11R-A24H-07  
TCGA-IQ-A6SH-01A-12R-A34R-07  
TCGA-BB-A6UM-01A-12R-A34R-07  
TCGA-F7-A50J-01A-21R-A28V-07  
TCGA-QK-A8Z9-01B-11R-A39I-07  
TCGA-CR-7397-01A-11R-2016-07  
TCGA-CR-7401-01A-11R-2016-07  
TCGA-CN-5364-01A-01R-1436-07  
TCGA-CV-7434-01A-11R-2132-07  
TCGA-BA-4074-01A-01R-1436-07  
TCGA-CN-6995-01A-31R-2016-07  
TCGA-MT-A67F-01A-11R-A30B-07  
TCGA-CV-7250-01A-11R-2016-07  
TCGA-CQ-7072-01A-21R-A30B-07  
TCGA-WA-A7H4-01A-21R-A34R-07  
TCGA-CV-7090-01A-11R-2016-07  
TCGA-D6-A6EK-01A-11R-A31N-07  
TCGA-CN-6024-01A-11R-1686-07  
TCGA-DQ-5631-01A-01R-1873-07  
TCGA-QK-A6IF-01A-11R-A31N-07  
TCGA-CN-6019-01A-11R-1686-07  
TCGA-CR-7391-01A-11R-2016-07  
TCGA-CV-7254-01A-11R-2016-07  
TCGA-CV-6954-01A-11R-1915-07  
TCGA-CV-7411-01A-11R-2081-07  
TCGA-D6-A74Q-01A-11R-A34R-07  
TCGA-CN-4722-01A-01R-1436-07  
TCGA-CQ-6221-01A-11R-2081-07  
TCGA-CX-A4AQ-01A-11R-A24Z-07  
TCGA-BA-A6DD-01A-12R-A31N-07  
TCGA-MZ-A6I9-01A-11R-A31N-07  
TCGA-CR-7367-01A-11R-2016-07  
TCGA-QK-A8Z7-01A-11R-A39I-07  
TCGA-CN-5367-01A-01R-1436-07  
TCGA-DQ-7592-01A-11R-2081-07  
TCGA-CN-4734-01A-01R-1436-07  
TCGA-BA-6869-01A-11R-1873-07  
TCGA-IQ-A61E-01A-22R-A30B-07  
TCGA-UF-A7JK-01A-11R-A34R-07  
TCGA-CN-6023-01A-11R-1686-07  
TCGA-CR-7369-01A-11R-2132-07  
TCGA-MT-A51X-01A-11R-A266-07

TCGA-QK-AA3K-01A-11R-A39I-07

TCGA-CN-5366-01A-01R-1436-07

### **561 AM genes**

AACS  
PDHB  
ALDH1B1  
ACADS  
PDHA1  
ABAT  
PDHA2  
ALDH2  
ACAT2  
ACAT1  
OXCT1  
HADH  
BDH1  
HADHA  
ACSM1  
HMGCL  
AKR1B10  
ECHS1  
ALDH9A1  
GAD1  
ALDH3A2  
ACSM3  
GAD2  
ACSM4  
HMGCS2  
EHHADH  
HMGCS1  
ALDH7A1  
ALDH5A1  
BDH2  
OXCT2  
ACSM2A  
ACSM5  
L2HGDH  
TDO2  
HAAO  
SRM  
GGT1  
GSTP1

GSTT2  
GSTT1  
GSTZ1  
RRM2B  
SMS  
PGD  
GSTO1  
GSTA5  
MGST2  
LAP3  
MGST1  
MGST3  
GSTA3  
GSTM1  
GPX7  
GSTA4  
GPX6  
GSTM4  
GGCT  
GSTM3  
GSTM2  
GSTM5  
GSTA1  
GSTA2  
GSR  
GSS  
RRM1  
RRM2  
GCLC  
GSTK1  
GPX5  
TXNDC12  
GPX1  
MAOA  
CPS1  
P4HA3  
ALDH1B1  
GATM  
ALDH2  
OTC  
PRODH2  
OAT  
CKM  
ACY1

SAT2  
CARS2  
DARS2  
RARS1  
SARS1  
VAR2  
YARS2  
WARS1  
AARS1  
FARS2  
HARS1  
SARS2  
RARS2  
NARS1  
LARS2  
FARS2  
AARS2  
YARS1  
NARS2  
GARS1  
IARS2  
KARS1  
WARS2  
TARS3  
LARS1  
VAR2  
PAR2  
MAR2  
CAR2  
IARS1  
TARS2  
SEPSECS  
MTFMT  
TARS1  
DARS1  
HARS2  
PSTK  
QARS1  
EARS2  
EPRS1  
FARS2  
MAR2  
GLUD2  
GFPT2

AGXT2  
CPS1  
GLS2  
ABAT  
ADSS2  
ADSL  
GLUD1  
GLS  
ASL  
IL4I1  
GPT  
GFPT1  
GPT2  
DDO  
ADSS1  
ACY3  
GAD1  
GAD2  
GOT2  
AGXT  
GLUL  
NIT2  
GOT1  
ALDH4A1  
CAD  
ALDH5A1  
ASS1  
ASNS  
PPAT  
ASPA  
TAT  
MIF  
NAA80  
PNMT  
DCT  
LCMT1  
TPO  
TH  
FAH  
ALAS1  
ALAS2  
GLYCTK  
MAOB  
AGXT2

MAOA  
AOC2  
GATM  
SDS  
AOC3  
GNMT  
SHMT1  
GCAT  
PHGDH  
DMGDH  
SHMT2  
SRR  
PSAT1  
BHMT  
GLDC  
DLD  
GAMT  
PSPH  
AGXT  
SARDH  
AMT  
CHDH  
CBS  
CTH  
PIPOX  
DAO  
ADH4  
ALDH3B2  
ADH5  
HEMK1  
ADH1A  
GOT2  
LCMT2  
TRMT11  
GOT1  
TYRP1  
AMD1  
SRM  
ADI1  
AHCY  
DNMT1  
SDS  
TRDMT1  
DNMT3A



DNMT3B  
LDHC  
IL4I1  
SMS  
LDHB  
ENOPH1  
BHMT  
GOT2  
CDO1  
APIP  
GOT1  
LDHAL6B  
TAT  
AHCYL1  
MTAP  
MAT2B  
LDHA  
MTR  
CBS  
MAT1A  
AHCYL2  
CTH  
MAT2A  
MPST  
LDHAL6A  
DNMT3L  
ADH7  
DBH  
ADH6  
METTL2B  
ADH1B  
ALDH1A3  
ADH1C  
AOX1  
ALDH1B1  
ACADS  
ACADSB  
ABAT  
ALDH2  
ACADM  
ACAT2  
HSD17B10  
ACAT1  
OXCT1

ACAA2  
IL4I1  
HADH  
MCEE  
HADHB  
DBT  
HADHA  
ALDH6A1  
HMGCL  
IVD  
BCKDHB  
ACAD8  
ECHS1  
ALDH9A1  
ALDH3A2  
PCCB  
HIBCH  
DLD  
HMGCS2  
EHHADH  
HMGCS1  
PCCA  
ALDH7A1  
HIBADH  
ACAA1  
OXCT2  
MMUT  
MCCC2  
BCAT1  
AUH  
BCAT2  
BCKDHA  
MCCC1  
PDHB  
VARS2  
IARS2  
PDHA1  
PDHA2  
LARS1  
LARS2  
VARS1  
BCAT1  
BCAT2  
IARS1

GGT7  
CSAD  
GGT5  
GGT1  
GAD1  
BAAT  
GAD2  
GGT6  
CDO1  
ADO  
ALDH9A1  
ALDH3A2  
CKMT1B  
PYCR3  
GAMT  
PRODH  
ALDH4A1  
CKMT2  
PYCR2  
ODC1  
ANPEP  
GGT7  
GSTO2  
GGT5  
G6PD  
ODC1  
GOT1  
PRDX6  
TAT  
MIF  
NAA80  
IL4I1  
DDC  
SUV39H2  
AASDHPPT  
DLST  
ALDH1B1  
AASDH  
ALDH2  
ACAT2  
PLOD2  
PLOD1  
TMLHE  
EHMT2

ACAT1  
KMT5A  
HADH  
SETMAR  
OGDH  
HADHA  
BBOX1  
AASS  
ECHS1  
ALDH9A1  
ALDH3A2  
KMT5B  
SUV39H1  
ASH1L  
SETD1B  
DOT1L  
NSD2  
EHHADH  
OGDHL  
SETD1A  
GCDH  
KMT5C  
SETD7  
ALDH7A1  
NSD3  
EHMT1  
SETDB1  
AADAT  
SETD2  
SETDB2  
PLOC3  
NSD1  
PIPOX  
SRM  
AZIN2  
GLUD2  
GLS2  
ARG1  
ARG2  
GLUD1  
GLS  
ASL  
CKMT1A  
P4HA2

SMS  
CKB  
NOS3  
NOS2  
NOS1  
GOT2  
GLUL  
P4HA1  
AOC1  
ALDH7A1  
LAP3  
AGMAT  
GOT1  
PYCR1  
ASS1  
ALDH18A1  
SAT1  
NAGS  
DAO  
AMD1  
MAOB  
CNDP1  
MAOB  
MAOA  
ALDH1B1  
ALDH2  
METTL6  
ALDH3A1  
BUD23  
HAL  
HNMT  
DDC  
ACY3  
ALDH1A3  
METTL2B  
ALDH3B1  
ALDH3B2  
ALDH9A1  
ALDH3A2  
HEMK1  
LCMT2  
UROC1  
TRMT11  
AOC1

ALDH7A1  
FTCD  
AMDHD1  
ASPA  
LCMT1  
HDC  
ALDH3B1  
MAOB  
MAOA  
HPD  
AOX1  
AOC2  
TYR  
HGD  
METTL6  
ALDH3A1  
COMT  
AOC3  
BUD23  
IL4I1  
GSTZ1  
DDC  
ALDH1A3  
ALDH3B1  
ALDH3B2  
MAOB  
MAOA  
HPD  
GOT2  
AOC2  
ALDH3A1  
AOC3  
PAH  
KYN  
AADAT  
TPH2  
ACMSD  
MAOB  
MAOA  
IDO2  
AOX1  
ALDH1B1  
AANAT  
ALDH2

WARS1  
IDO1  
CAT  
ACAT2  
ACAT1  
IL4I1  
HADH  
OGDH  
TPH1  
HADHA  
DDC  
AFMID  
CYP1A1  
CYP1A2  
CYP1B1  
ASMT  
ECHS1  
ALDH9A1  
KMO  
ALDH3A2  
WARS2  
EHHADH  
OGDHL  
CNDP1  
SRM  
ECHS1  
ALDH9A1  
ALDH3A2  
GAD1  
GAD2  
AOC2  
ALDH1B1  
HIBCH  
ABAT  
EHHADH  
ALDH2  
ACADM  
UPB1  
ALDH7A1  
AOC3  
DPYS  
DPYD  
MLYCD  
HADHA

SMS  
 GPX2  
 GPX3  
 IDH2  
 GPX4  
 IDH1  
 OPLAH  
 GCLM  
 GGT6  
 METTL6  
 AHCY  
 BUD23  
 SEPHS1  
 GGT1  
 SEPHS2  
 METTL2B  
 HEMK1  
 GGT6  
 LCMT2  
 PAPSS1  
 PAPSS2  
 TRMT11  
 MARS2  
 SCLY  
 AHCYL1  
 GGT7  
 GGT5  
 MAT2B  
 MAT1A  
 LCMT1  
 CBS  
 AHCYL2  
 CTH  
 MAT2A  
 MARS1  
 GCDH  
 ALDH7A1  
 AOC1  
 INMT

Multiple hypothesis testing of K-M analysis

|       |            |    |              |
|-------|------------|----|--------------|
| ALDH2 | Chi-square | df | significance |
|-------|------------|----|--------------|



|                                |       |   |      |
|--------------------------------|-------|---|------|
| Log Rank (Mantel-Cox)          | 6.372 | 1 | .012 |
| Breslow (Generalized Wilcoxon) | 3.745 | 1 | .053 |
| Tarone-Ware                    | 4.779 | 1 | .029 |

|                                | Chi-square | df | significance |
|--------------------------------|------------|----|--------------|
| <b>ACAT1</b>                   |            |    |              |
| Log Rank (Mantel-Cox)          | 3.609      | 1  | .057         |
| Breslow (Generalized Wilcoxon) | 5.719      | 1  | .017         |
| Tarone-Ware                    | 5.035      | 1  | .025         |

|                                | Chi-square | df | significance |
|--------------------------------|------------|----|--------------|
| <b>SMS</b>                     |            |    |              |
| Log Rank (Mantel-Cox)          | 11.716     | 1  | .001         |
| Breslow (Generalized Wilcoxon) | 15.689     | 1  | .000         |
| Tarone-Ware                    | 15.217     | 1  | .000         |

|                                | Chi-square | df | significance |
|--------------------------------|------------|----|--------------|
| <b>ASNS</b>                    |            |    |              |
| Log Rank (Mantel-Cox)          | 17.728     | 1  | .000         |
| Breslow (Generalized Wilcoxon) | 8.466      | 1  | .004         |
| Tarone-Ware                    | 11.635     | 1  | .001         |

|                                | Chi-square | df | significance |
|--------------------------------|------------|----|--------------|
| <b>GNMT</b>                    |            |    |              |
| Log Rank (Mantel-Cox)          | 10.751     | 1  | .001         |
| Breslow (Generalized Wilcoxon) | 11.821     | 1  | .001         |
| Tarone-Ware                    | 11.724     | 1  | .001         |

| <b>PAH</b>                     | Chi-square | df | significance |
|--------------------------------|------------|----|--------------|
| Log Rank (Mantel-Cox)          | 4.557      | 1  | .033         |
| Breslow (Generalized Wilcoxon) | .617       | 1  | .432         |
| Tarone-Ware                    | 1.611      | 1  | .204         |

| <b>KYNU</b>                    | Chi-square | df | significance |
|--------------------------------|------------|----|--------------|
| Log Rank (Mantel-Cox)          | 1.305      | 1  | .253         |
| Breslow (Generalized Wilcoxon) | 1.391      | 1  | .238         |
| Tarone-Ware                    | 1.647      | 1  | .199         |

| <b>P4HA1</b>                   | Chi-square | df | significance |
|--------------------------------|------------|----|--------------|
| Log Rank (Mantel-Cox)          | 19.556     | 1  | .000         |
| Breslow (Generalized Wilcoxon) | 24.656     | 1  | .000         |
| Tarone-Ware                    | 24.234     | 1  | .000         |
| <b>PL0D2</b>                   | Chi-square | df | significance |
| Log Rank (Mantel-Cox)          | 9.953      | 1  | .002         |
| Breslow (Generalized Wilcoxon) | 7.103      | 1  | .008         |
| Tarone-Ware                    | 8.244      | 1  | .004         |
